# Supplementary material for: Synthesis of rhombohedral Hf0.5Zr0.5O2 and analysis by X-ray diffraction through dynamical diffraction simulations
Source: Royal Society of Chemistry journal article supplement (doi:10.1039/d4ma00550c), 2024-01-01
Supplement: d4ma00550c1.pdf [file d4ma00550c1.pdf]

# Synthesis of rhombohedral $\text{Hf}_{0.5}\text{Zr}_{0.5}\text{O}_2$ and analysis by x-ray diffraction through dynamical diffraction simulations

*Kit de Hond, Guus Rijnders, Gertjan Koster\**

MESA+ Institute for Nanotechnology, University of Twente, P.O. Box 217, 7500 AE Enschede,  
the Netherlands

Table S1: Most important parameters for the single layer simulations.

|      | Layer thick-<br>ness $t$ (Å) | RMS Rough-<br>ness $\sigma$ (nm) | Debye-Waller<br>factor $W_h$ |
|------|------------------------------|----------------------------------|------------------------------|
| STO  | -                            | 1.0                              | 0.60                         |
| LSMO | 194                          | 2.0                              | 0.18                         |
| HZO  | 105                          | 3.0                              | 0.50                         |

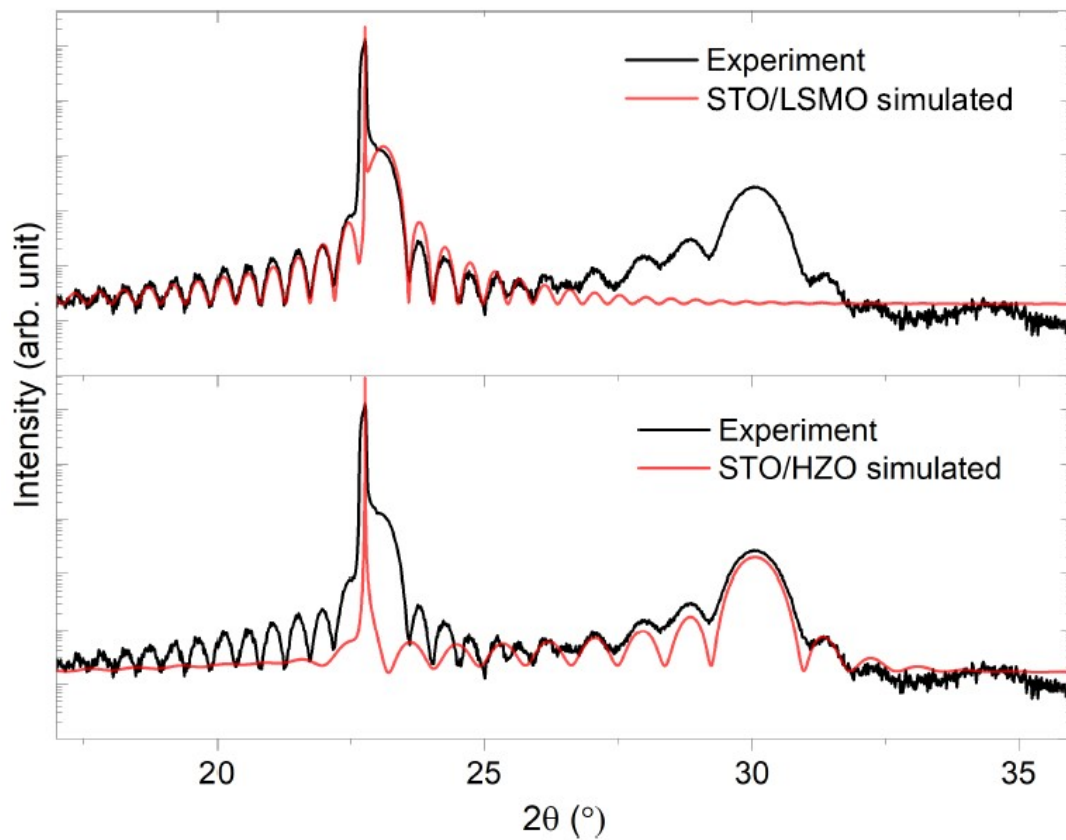

Figure S1: Dynamical XRD simulations of the LSMO and HZO layer separately. Both layers are simulated as being strained on an STO substrate.

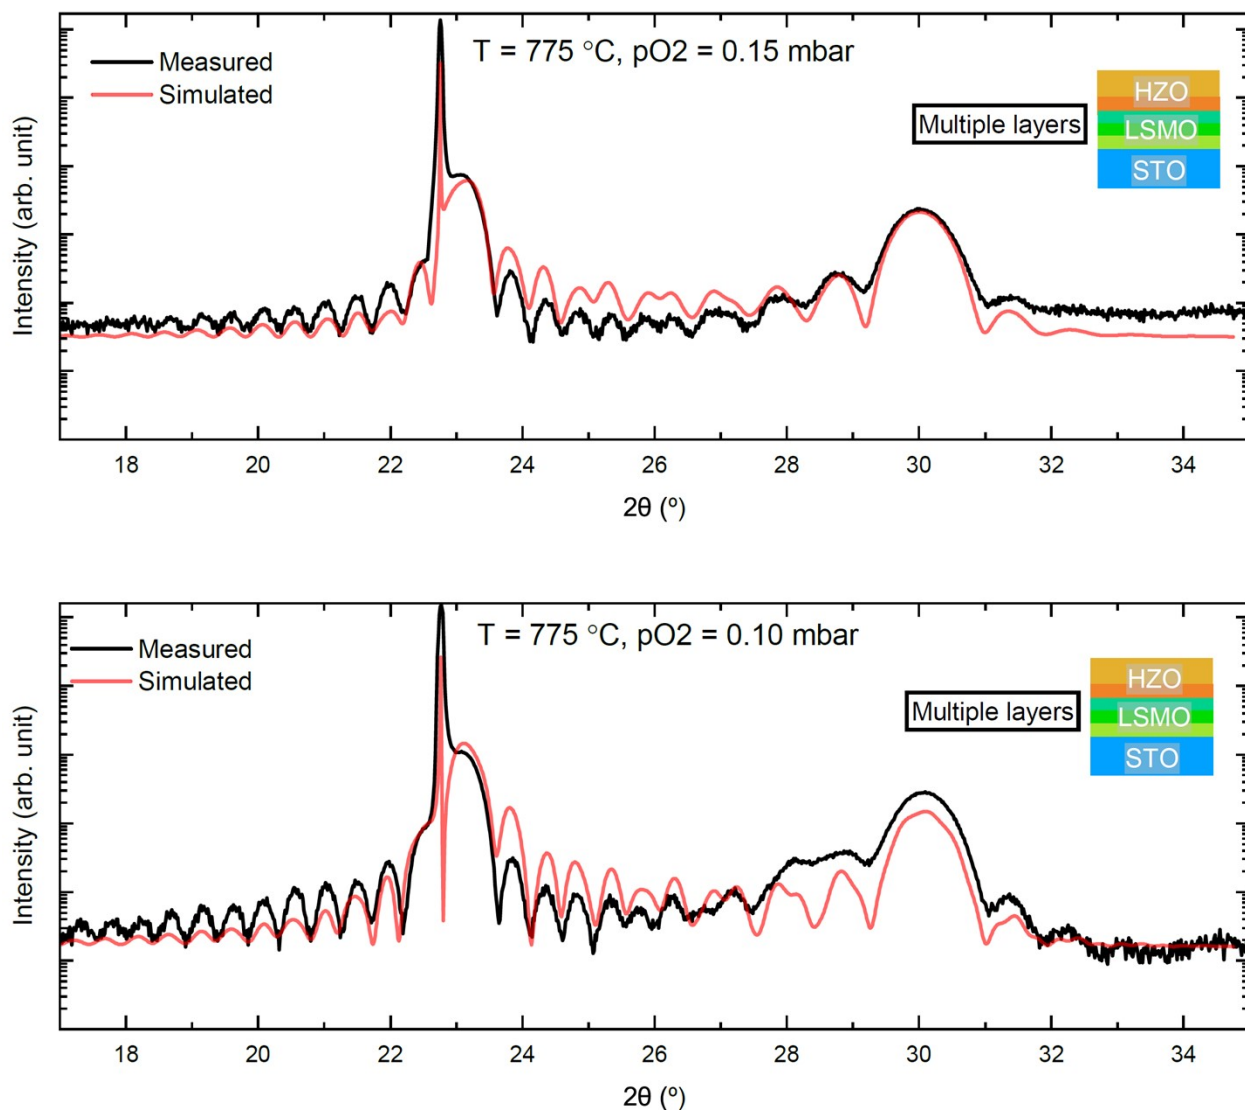

Figure S2: Dynamical XRD simulations for samples with different growth conditions. Both samples are simulated by splitting up the LSMO and HZO layers into multiple sublayers.
